# Supplementary material for: Causal associations between CD40/CD40L and aortic diseases: A mendelian randomization study
Source: Frontiers journal article supplement (doi:10.3389/fgene.2022.998525), 2022-11-09
Supplement: Data_Sheet_1.PDF [file Data_Sheet_1.PDF]

## *Supplementary Material*

### Supplementary Figures and Tables

#### Supplementary Figures

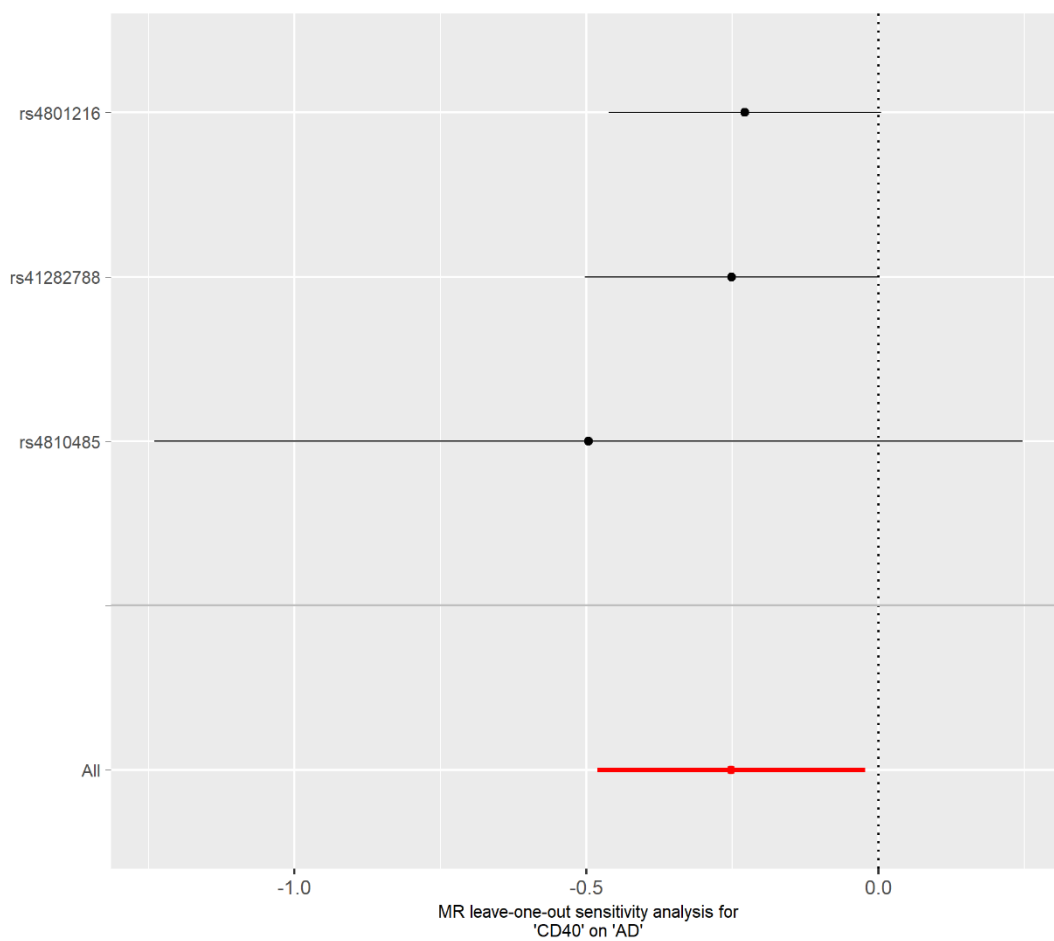

**Supplemental Figure 1. Leave-one-out sensitivity analysis of genetic proxied CD40 levels on the risk of AD.** AD, aortic dissection; MR, Mendelian randomization.

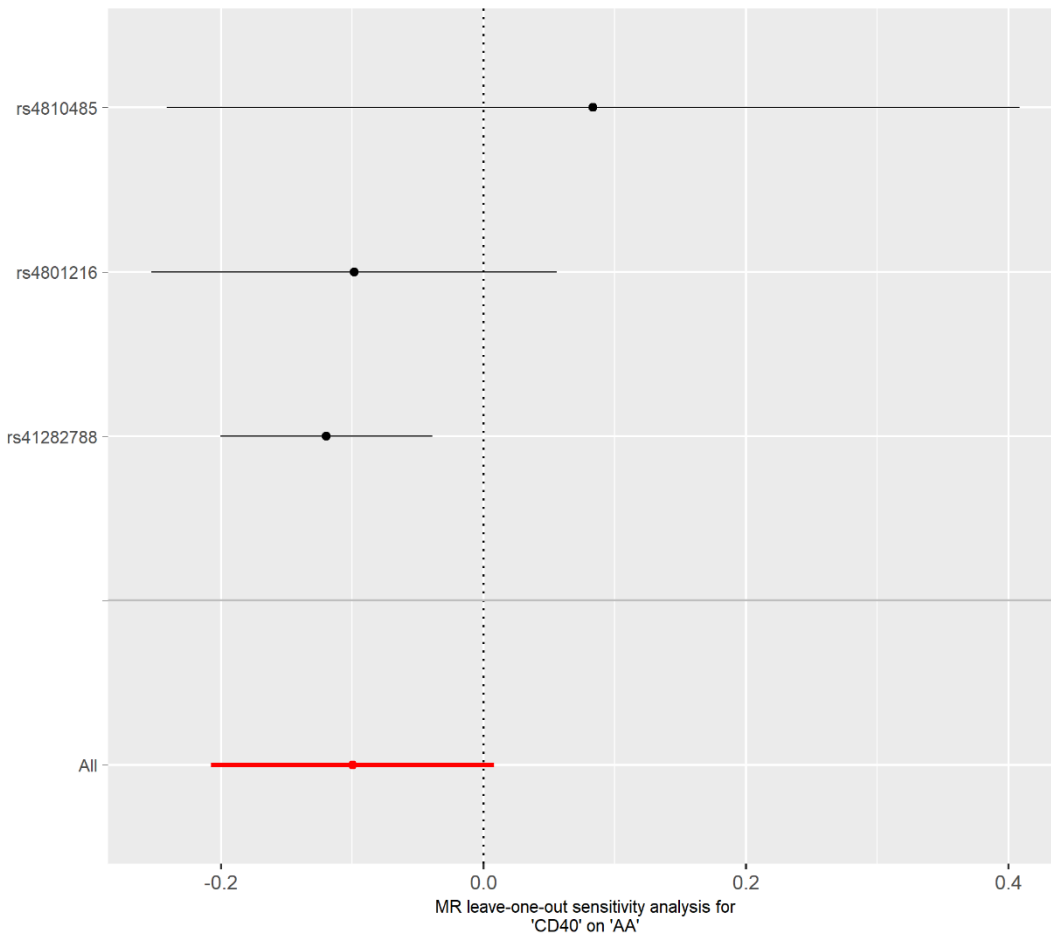

**Supplemental Figure 2. Leave-one-out sensitivity analysis of genetic proxied CD40 levels on the risk of AA.** AA, aortic aneurysm; MR, Mendelian randomization.

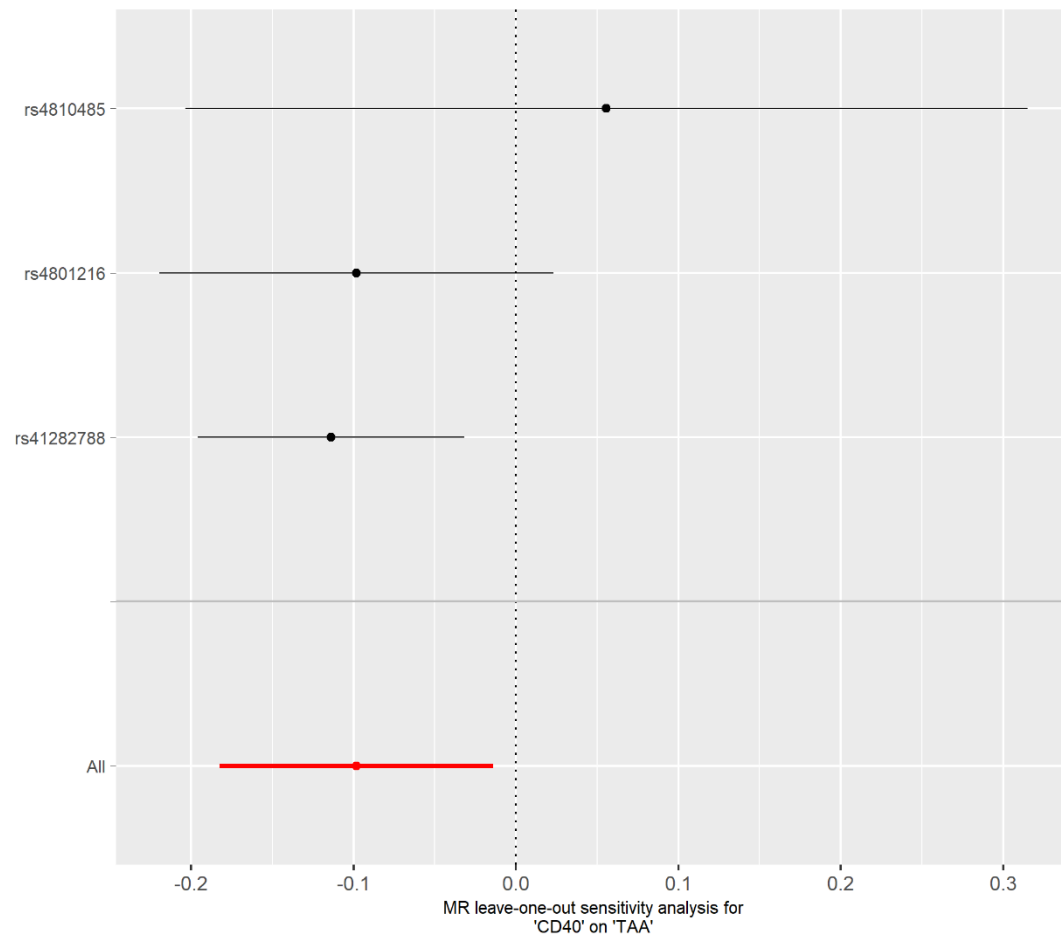

**Supplemental Figure 3. Leave-one-out sensitivity analysis of genetic proxied CD40 levels on the risk of TAA.** TAA, thoracic aortic aneurysm; MR, Mendelian randomization.

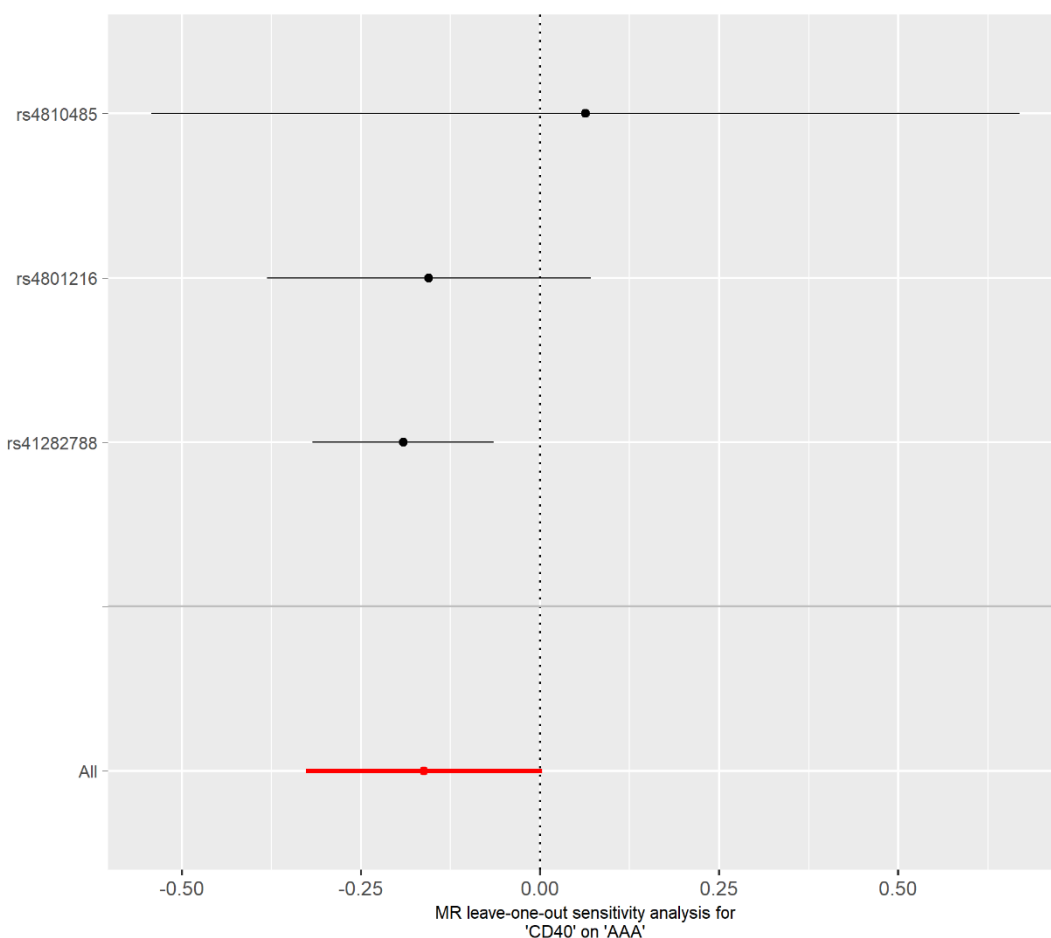

**Supplemental Figure 4** Leave-one-out sensitivity analysis of genetic proxied CD40 levels on the risk of AAA. AAA, abdominal aortic aneurysm; MR, Mendelian randomization.

### Supplementary Tables

**Supplementary Table 1.** Pleiotropy analyses based on MR-Egger regression of the two-sample MR analyses of CD40 and aortic diseases

| Aortic diseases | Intercept | Se    | P value |
|-----------------|-----------|-------|---------|
| AD              | -0.075    | 0.071 | 0.482   |
| AA              | -0.006    | 0.047 | 0.923   |
| TAA             | -0.001    | 0.037 | 0.982   |

|     |        |       |       |
|-----|--------|-------|-------|
| AAA | -0.024 | 0.069 | 0.790 |
|-----|--------|-------|-------|

AA, aortic aneurysm; TAA, thoracic aortic aneurysm; AAA, abdominal aortic aneurysm.

**Supplementary Table 2. Heterogeneity analyses based on Cochrane's Q test for the two-sample MR analyses of CD40 and aortic diseases**

| Aortic diseases | Cochrane's Q | Qdf | H statistic | I <sup>2</sup> | P value |
|-----------------|--------------|-----|-------------|----------------|---------|
| AD              | 1.129        | 2   | 0.751       | -0.772         | 0.569   |
| AA              | 3.814        | 2   | 1.381       | 0.476          | 0.149   |
| TAA             | 2.253        | 2   | 1.061       | 0.112          | 0.324   |
| AAA             | 3.622        | 2   | 1.346       | 0.448          | 0.163   |

AA, aortic aneurysm; TAA, thoracic aortic aneurysm; AAA, abdominal aortic aneurysm.
